# Supplementary material for: Direct observation of cytoskeleton-dependent trafficking of miRNA visualized by the introduction of pre-miRNA
Source: PubMed Central journal article supplement (PMC10831896; doi:10.1016/j.isci.2024.108811), 2024-01-05
Supplement: mmc1.pdf [file mmc1.pdf]

**iScience, Volume 27**

**Supplemental information**

**Direct observation of cytoskeleton-dependent  
trafficking of miRNA visualized  
by the introduction of pre-miRNA**

**Toshinari Ishikawa, Ko Sugawara, Junwei Zhang, Takashi Funatsu, and Kohki Okabe**

## Supplementary Figures

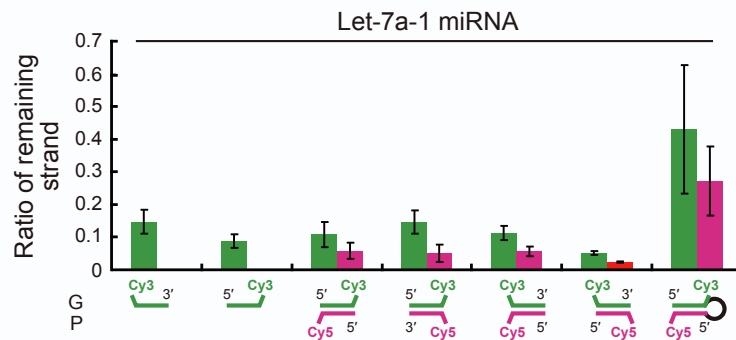

### Supplementary Figure S1. Comparison of remaining efficiency upon introduction of various fluorescently labeled miRNA precursors in living HeLa cells, Related to Figure 1

The proportion of remaining strands in the cytoplasm. The results are shown for seven miRNA precursors with guide strands labeled with Cy3 and/or passenger strands labeled with Cy5. The proportion of total fluorescence intensity in the cytoplasm at 60 min after microinjection to that at 2 min after microinjection is shown. Guide (green) and passenger (magenta) strands are shown. Error bars represent SD ( $n = 6-12$  cells). G and P stand for guide and passenger sequences of miRNA, respectively.

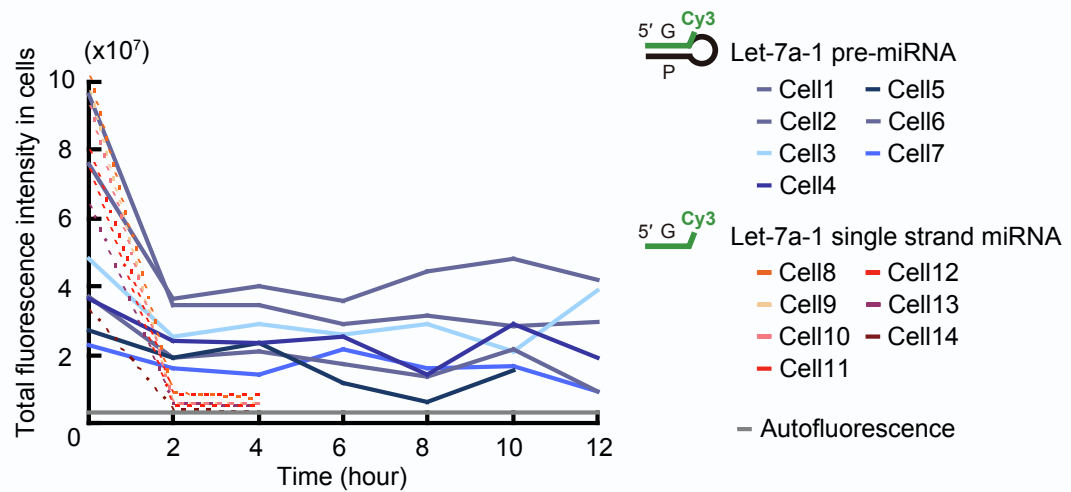

**Supplementary Figure S2. Stability of miRNA precursors in living cells, Related to Figure 1**

The total fluorescence intensity of let-7a-1 miRNA precursors whose guide strand was labeled with Cy3 microinjected into the cytoplasm of living COS7 cells [cells 1–7 (pre-miRNA) and cells 8–14 (single-strand miRNA)] was tracked using epifluorescence microscopy. The signal of autofluorescence is shown as a green solid line. G and P stand for guide and passenger sequences of miRNA, respectively.

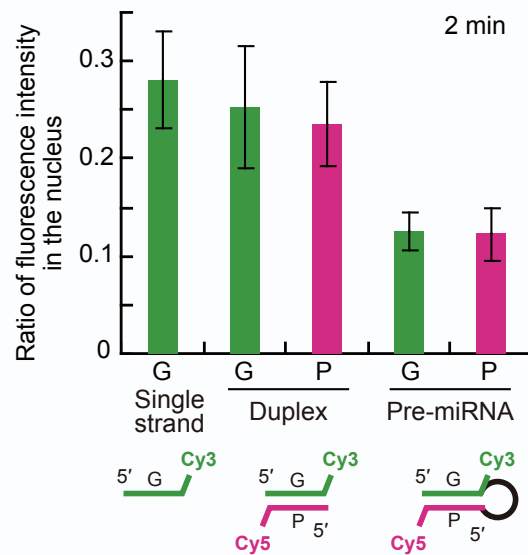

**Supplementary Figure S3. Accumulation of miRNA precursors in the nucleus immediately after introduction, Related to Figure 1**

The proportion of fluorescence intensity of Cy3 (and Cy5)-labeled let-7a-1 miRNA precursors (single-stranded miRNA, duplex, and pre-miRNA) in the nucleus relative to that of the whole cell at 2 min after introduction into the cytoplasm of living COS7 cells. Green and magenta indicate Cy3-labeled guide strand and Cy5-labeled passenger strand, respectively. Error bars represent SD [ $n = 11$  cells (single strand), 12 cells (duplex), 14 cells (pre-miRNA)]. G and P stand for guide and passenger sequences of miRNA, respectively.

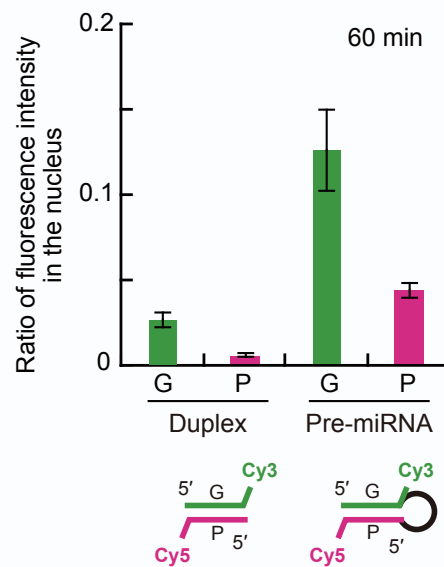

**Supplementary Figure S4. Accumulation of miRNA precursors in the nucleus at 60 min after introduction, Related to Figure 2**

The proportion of fluorescence intensity of Cy3 (and Cy5)-labeled let-7a-1 miRNA precursors (duplex and pre-miRNA) in the nucleus relative to that of the whole cell at 60 min after introduction into the cytoplasm of living COS7 cells. Green and magenta indicate Cy3-labeled guide strand and Cy5-labeled passenger strand, respectively. Error bars represent SD [ $n = 12$  cells (duplex), 14 cells (pre-miRNA)]. G and P stand for guide and passenger sequences of miRNA, respectively.

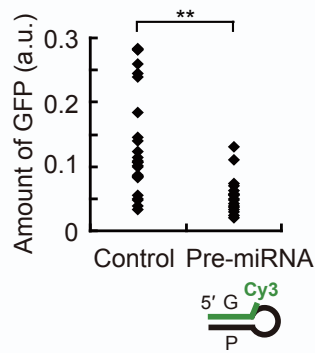

### Supplementary Figure S5. Inhibition of translation by fluorescent miRNA, Related to Figure 2

The level of GFP of the gene containing the target sequence of let-7a-1 miRNA was normalized to that of RFP that did not have an miRNA target. COS7 cells in which Cy3-labeled let-7a-1 pre-miRNA was introduced showed a significantly lower level of GFP. The control represents the results in cells without pre-miRNA introduction. Each rhombus represents a single cell.  $**p < 0.01$ ; Mann-Whitney U test,  $n = 25$  cells (Control) and 17 cells (Pre-miRNA). G and P stand for guide and passenger sequences of miRNA, respectively.

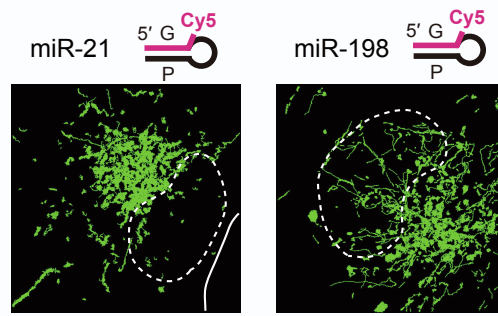

**Supplementary Figure S6. Tracking of miR-21 and miR-198 particles in living cells, Related to Figure**

Cy5-labeled pre-miRNAs were introduced and allowed to mature, followed by single-particle tracking. Dotted and solid lines indicate the nucleus and the cell periphery, respectively. G and P stand for guide and passenger sequences of miRNA, respectively. Scale bar, 10  $\mu\text{m}$ .

## Supplementary Tables

**Supplementary Table S1 Sequences of miRNA used in this study, Related to Figure 1**

| Name            | Form          | Guide/Passenger                                          | Sequence*                                                      |
|-----------------|---------------|----------------------------------------------------------|----------------------------------------------------------------|
| <b>Let-7a-1</b> | Single strand | Guide                                                    | UGAGGUAGUAGGUUGUAUAGUU-Cy3                                     |
|                 | Duplex        | Guide                                                    | UGAGGUAGUAGGUUGUAUAGUU-Cy3                                     |
|                 |               | Passenger                                                | CUAUACAAUCUACUGUCUUUC - Cy5                                    |
|                 | Pre-miRNA     | Guide                                                    | UGAGGUAGUAGGUUGUAUAGUU(Alexa488)UUAGGGUCACACC†                 |
|                 |               | Guide                                                    | UGAGGUAGUAGGUUGUAUAGUU(Cy3)UUAGGGUCACACC†                      |
|                 |               | Guide                                                    | UGAGGUAGUAGGUUGUAUAGUU(Cy5)UUAGGGUCACACC†                      |
|                 |               | Guide                                                    | UGAGGUAGUAGGUUGUAUAGUU(Amino)UUAGGGUCACACC†                    |
|                 |               | Passenger                                                | PO <sub>3</sub> -CACCACUGGGAGAUAAACUAUACAAUCUACUGUCUUU(Cy5)CC† |
| Passenger       |               | PO <sub>3</sub> -CACCACUGGGAGAUAAACUAUACAAUCUACUGUCUUUCC |                                                                |
| <b>miR-21</b>   | Pre-miRNA     | Guide                                                    | UGUCGGGUAGCUUAUCAGACUGAUGUU(Amino)GACUGUUGA†                   |
|                 |               | Passenger                                                | PO <sub>3</sub> -AUCUCAUGGCAACACCAGUCGAUGGGCUGUCUGACA          |
| <b>miR-198</b>  | Pre-miRNA     | Guide                                                    | UCAUUGGUCCAGAGGGGAGAUAGGUU(Amino)CCUGUGAU†                     |
|                 |               | Passenger                                                | PO <sub>3</sub> -UUUCCUUCUUCUCUAUAGAAUAAAUGA                   |

\* All sequences are listed from their 5'-end to their 3'-end.

† (Alexa488), (Cy3), and (Cy5) indicate intrachain labelling with corresponding moieties.



**Supplementary Table S2 Sequences of antisense 2'-O-methyl RNA oligonucleotides used in this study, Related to Figure 2**

| <b>Target mRNA</b> | <b>Sequence*</b>                   |
|--------------------|------------------------------------|
| <b>Kras (1)</b>    | Amino-AGGCACUCUUGCCUACGCCA-biotin† |
| <b>Kras (2)</b>    | Amino-UCAUGUACUGGUCCUCAUU-biotin†  |
| <b>Kras (3)</b>    | Amino-CCUACUAGGACCAUAGGUAC-biotin† |
| <b>Luciferase‡</b> | Amino-GUUGUUUUGGAGCACGGAAA-biotin† |

\* All sequences are listed from their 5'-end to their 3'-end.

† Streptavidin was attached to antisense probes via biotin to prevent sequestration into the nucleus.

‡ Control probe that does not have a target in mammalian cells.

## **Supplementary Movies**

**Supplementary Movie 1. Tracking of miRNA particles along actin filaments in living cells.** Movie of Cy5-labeled let-7a-1 miRNA particles (red, 19 times faster than real time) is merged with averaged image of actin filaments (green).

**Supplementary Movie 2. Tracking of miRNA particles along microtubules in living cells.** Movie of Cy5-labeled let-7a-1 miRNA particles (red, 19 times faster than real time) is merged with averaged image of microtubules (green).

**Supplementary Movie 3. Tracking of miRNA particles in cytoskeleton-disrupted cells.** Movie of Cy5-labeled let-7a-1 miRNA particles in living COS7 cells in which both actin filaments and microtubules are destroyed. The movie runs 19 times faster than real time.
